# Supplementary material for: A direct assessment of human prion adhered to steel wire using real-time quaking-induced conversion
Source: PubMed Central journal article supplement (PMC4845018; doi:10.1038/srep24993), 2016-04-26
Supplement: srep24993-s1.pdf [file srep24993-s1.pdf]

## **Supplementary Information**

### **A direct assessment of human prion adhered to steel wire using real-time quaking-induced conversion**

Tsuyoshi Mori<sup>1\*</sup>, Ryuichiro Atarashi<sup>1</sup>, Kana Furukawa<sup>1</sup>, Hanae Takatsuki<sup>1</sup>, Katsuya Satoh<sup>2</sup>, Kazunori Sano<sup>3</sup>, Takehiro Nakagaki<sup>1</sup>, Daisuke Ishibashi<sup>1</sup>, Kazuko Ichimiya<sup>4</sup>, Masahisa Hamada<sup>4</sup>, Takehisa Nakayama<sup>4</sup> and Noriyuki Nishida<sup>1</sup>

<sup>1</sup>Department of Molecular Microbiology and Immunology, Nagasaki University Graduate School of Biomedical Sciences, 1-12-4 Sakamoto, Nagasaki 852-8523, Japan

<sup>2</sup>Department of Locomotive Rehabilitation Science, Nagasaki University Graduate School of Biomedical Sciences, 1-7-1 Sakamoto, Nagasaki 852-8523, Japan

<sup>3</sup>Department of Physiology and Pharmacology, Faculty of Pharmaceutical Sciences, Fukuoka University, 8-19-1 Nanakuma, Jonan-ku, Fukuoka 814-0180, Japan

<sup>4</sup>Krypton Co., Ltd., Dai 12 Daitetsu Bldg. 7F. 4-3-12 Yotsuya, Shinjuku-ku, Tokyo 160-0004, Japan

## Supplementary Figure S1

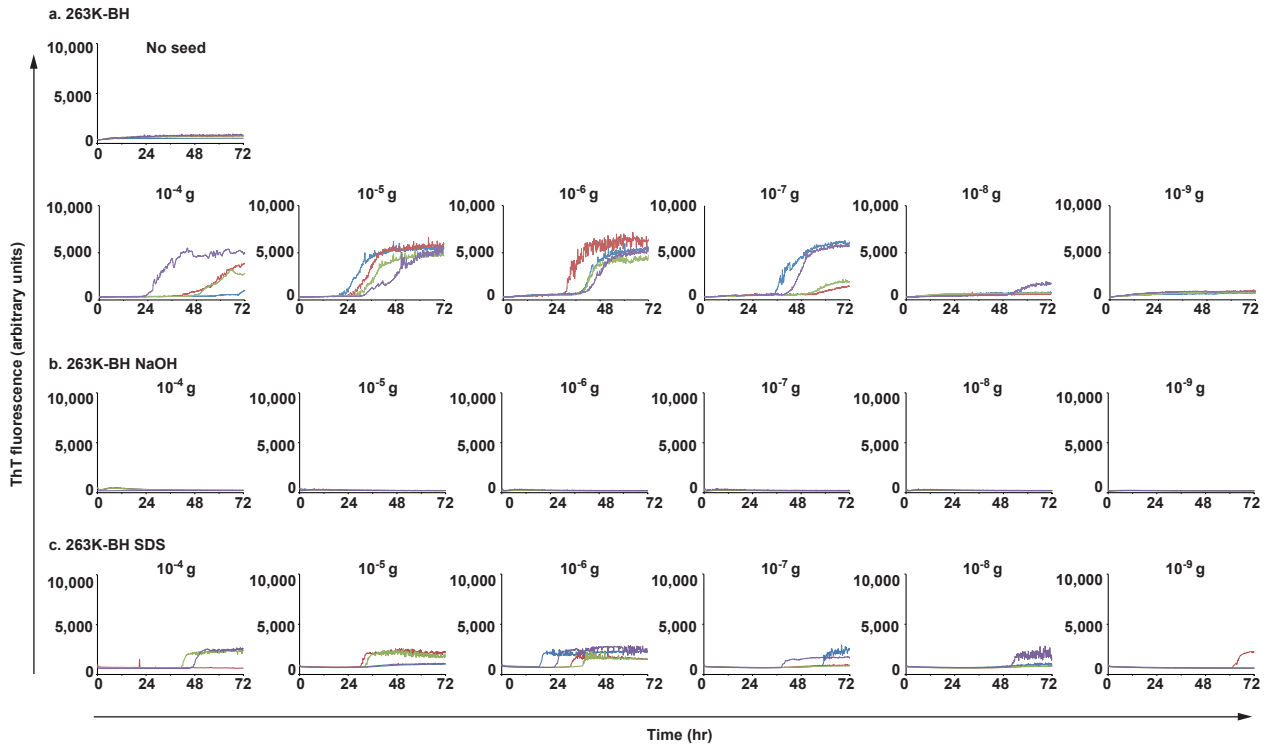

### Inactivation of 263K hamster prion seeds treated with NaOH or SDS solution, as evaluated by RT-QuIC reactions.

Dilutions of 263K-BH (10-fold) were treated with 1 mol/L of NaOH solution for 2 hr (b) or 3% (w/v) SDS solution at 100°C for 10 min (c). RT-QuIC reactions were performed to measure the residual prion-seeding activities.
